# Supplementary material
Source: MDPI journal article supplement (https://www.mdpi.com/2227-9040/11/5/279)
Supplement: s1 [file s1]

# **Fluorescence Evolution of Gold Nanoclusters in the Presence of Shapely Silver Nanoparticles and UV-vis Light**

Jui-Chang Chen, Wen-Chuan Hsiao, Chen-Yu Hsu, Bo-Hao Huang, Cheng-Liang  
Huang\*

Department of Applied Chemistry, National Chiayi University, 300 Syuefu  
Road, Chiayi City 60004, Taiwan; chenjc@mail.ncyu.edu.tw (J.-C.C.);  
nandfkomol@gmail.com (W.-C.H.); sebastian1012806@gmail.com (C.-Y.H.);  
a048729701@gmail.com (B.-H.H.)

\* Correspondence: clhuang@mail.ncyu.edu.tw; Fax: +886-5-2717901

## Supplementary Materials

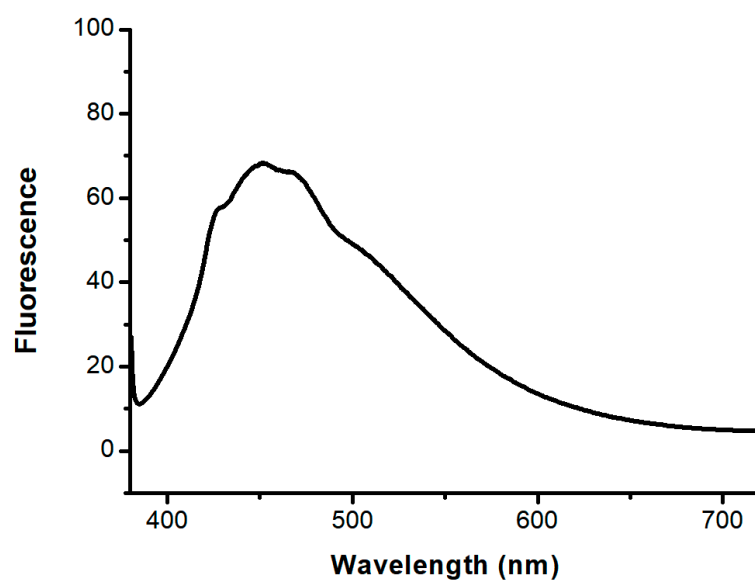

Figure S1: The fluorescence spectrum of NaOH-treated-BSA excited at 370 nm light. NaOH treated BSA were prepared by adding 0.5 mL of NaOH solution (0.1 M) to 0.5 mL of BSA solution (0.05 g/mL) by shaking. After that, the solution was placed in a dry bath at 37 °C for 12 hours.
